# Supplementary material for: Synthesis and Evaluation of Functionalized Polyurethanes for pH-Responsive Delivery of Compounds in Chronic Wounds
Source: MDPI journal article supplement (doi:10.3390/gels9080611), 2023-07-28
Supplement: s1 [file s1]

## Article

# Synthesis and evaluation of functionalized polyurethanes for pH-responsive delivery of compounds: Potential dressing materials for chronic wounds

<sup>1</sup> Faculty of Engineering, School of Chemical and Biomolecular Engineering, The University of Sydney, Sydney, New South Wales, Australia.

<sup>2</sup> Key Centre for Polymers and Colloids, School of Chemistry, The University of Sydney, Sydney, NSW 2006, Australia.

<sup>3</sup> Sydney Institute for Infectious Diseases, The University of Sydney, Australia.

<sup>4</sup> Nano Institute (Sydney Nano), The University of Sydney, Sydney, New South Wales, Australia.

\* Correspondence: Sepehr.talebain@sydney.edu.au (S.T) and Sina.naficy@sydney.edu.au (S.N)

**Citation:** Li, Z.; Crago, M.; Schofield, T.; Zeng, H.; Vyas, H.K.N.; Müllner, M.; Mai-Prochnow, A.; Farajikhah, S.; Naficy, S.; Dehghani, F.; et al. Synthesis and evaluation of functionalized polyurethanes for pH-responsive delivery of compounds: Potential dressing materials for chronic wounds. *Gels* **2023**, volume number, x.

<https://doi.org/10.3390/xxxxx>

Academic Editor(s):

Received: date

Revised: date

Accepted: date

Published: date

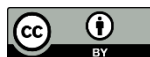

**Copyright:** © 2023 by the authors. Submitted for possible open access publication under the terms and conditions of the Creative Commons Attribution (CC BY) license (<https://creativecommons.org/licenses/by/4.0/>).

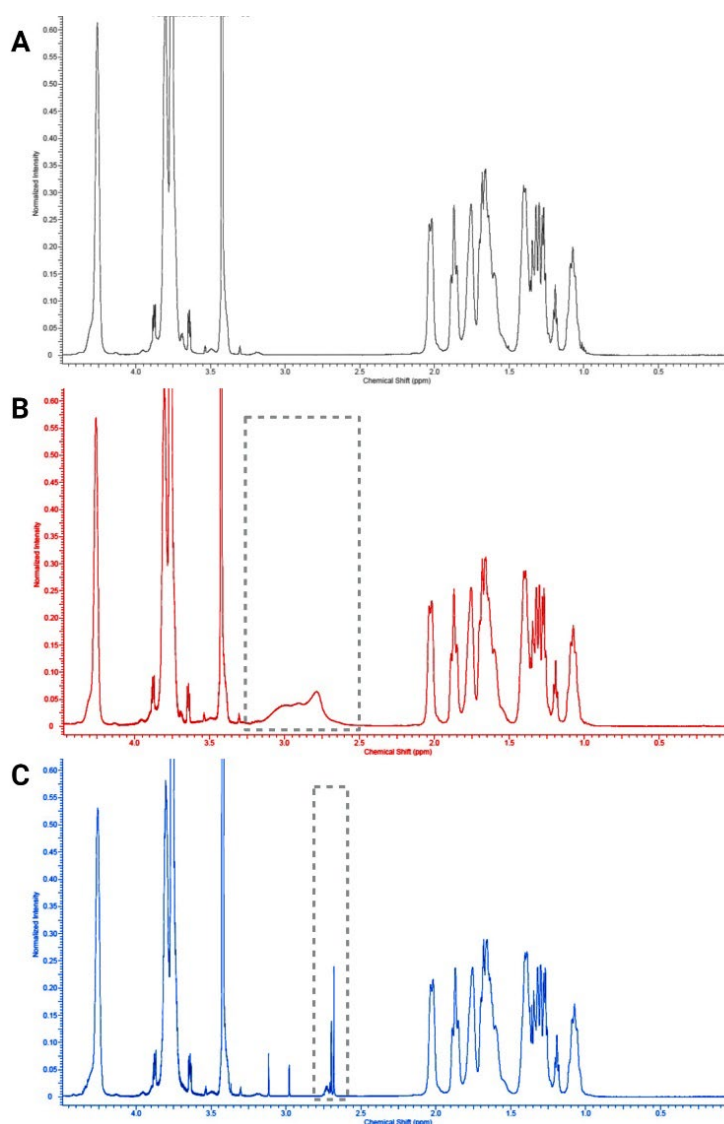

**Figure S1.** HNMR spectra of A) PU; B) PU-PEI; C) PU-CA in ethanol d<sub>4</sub>-D<sub>2</sub>O mixed solvent system.

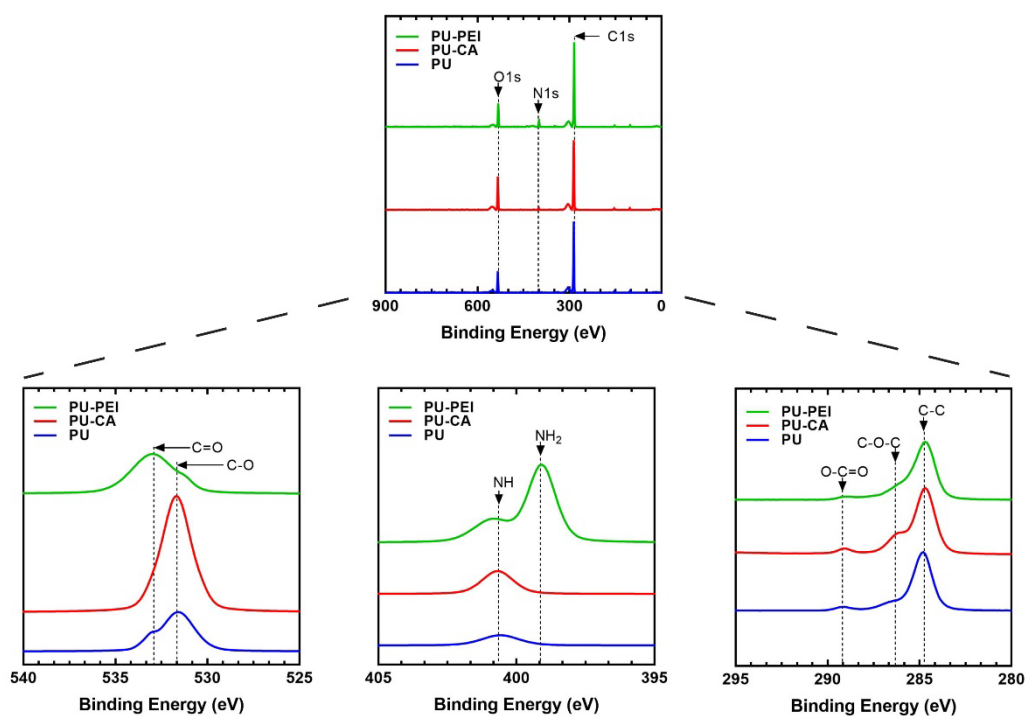

**Figure S2.** XPS spectra of polymers including survey scan (Top) and narrow scan of C1s, N1s, and O1s (from right to left, respectively).

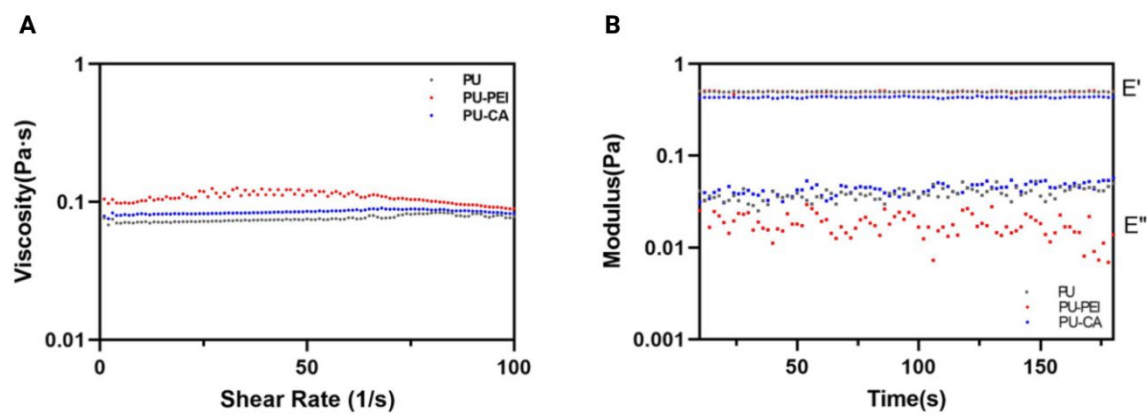

**Figure S3.** A) Viscosity measurement of 5% (w/v) of PU, PU-PEI and PU-CA; B) Storage modulus (E') and loss modulus (E'') of PU, PU-PEI and PU-CA.

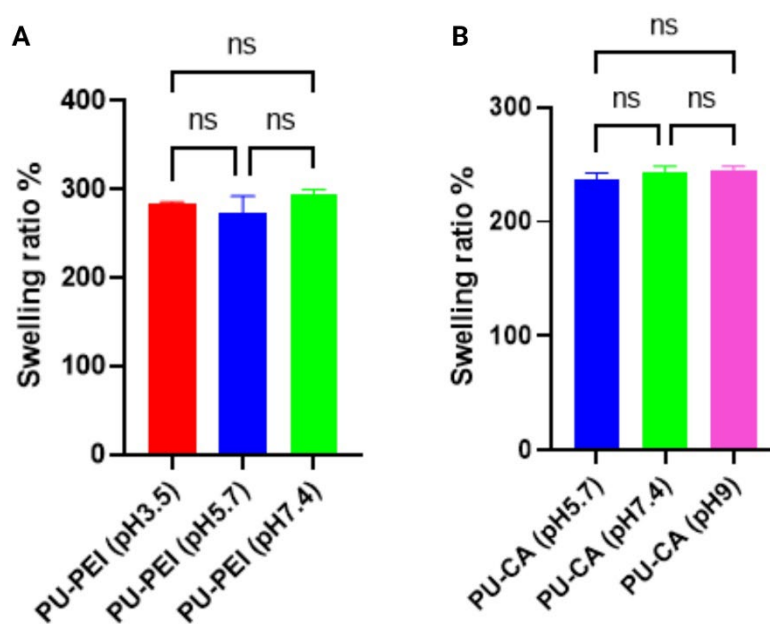

**Figure S4.** A) The swelling test of PU-PEI hydrogel films at pH (3.5), (5.7) and (7.4); B) The swelling test of PU-CA hydrogel films at pH (5.7), (7.4) and (9).

**Table S1.** Molecular weight of PU, PU-PEI and PU-CA.

|           | PU        | PU-PEI    | PU-CA     |
|-----------|-----------|-----------|-----------|
| $M_n$     | 172800 Da | 106800 Da | 101300 Da |
| $M_w$     | 332300 Da | 267200 Da | 223100 Da |
| $M_w/M_n$ | 1.92      | 2.50      | 2.20      |
